# Supplementary material for: Working hours and self-rated health over 7 years: gender differences in a Korean longitudinal study
Source: Springer Nature journal article supplement (doi:10.1186/s12889-015-2641-1), 2015-12-01

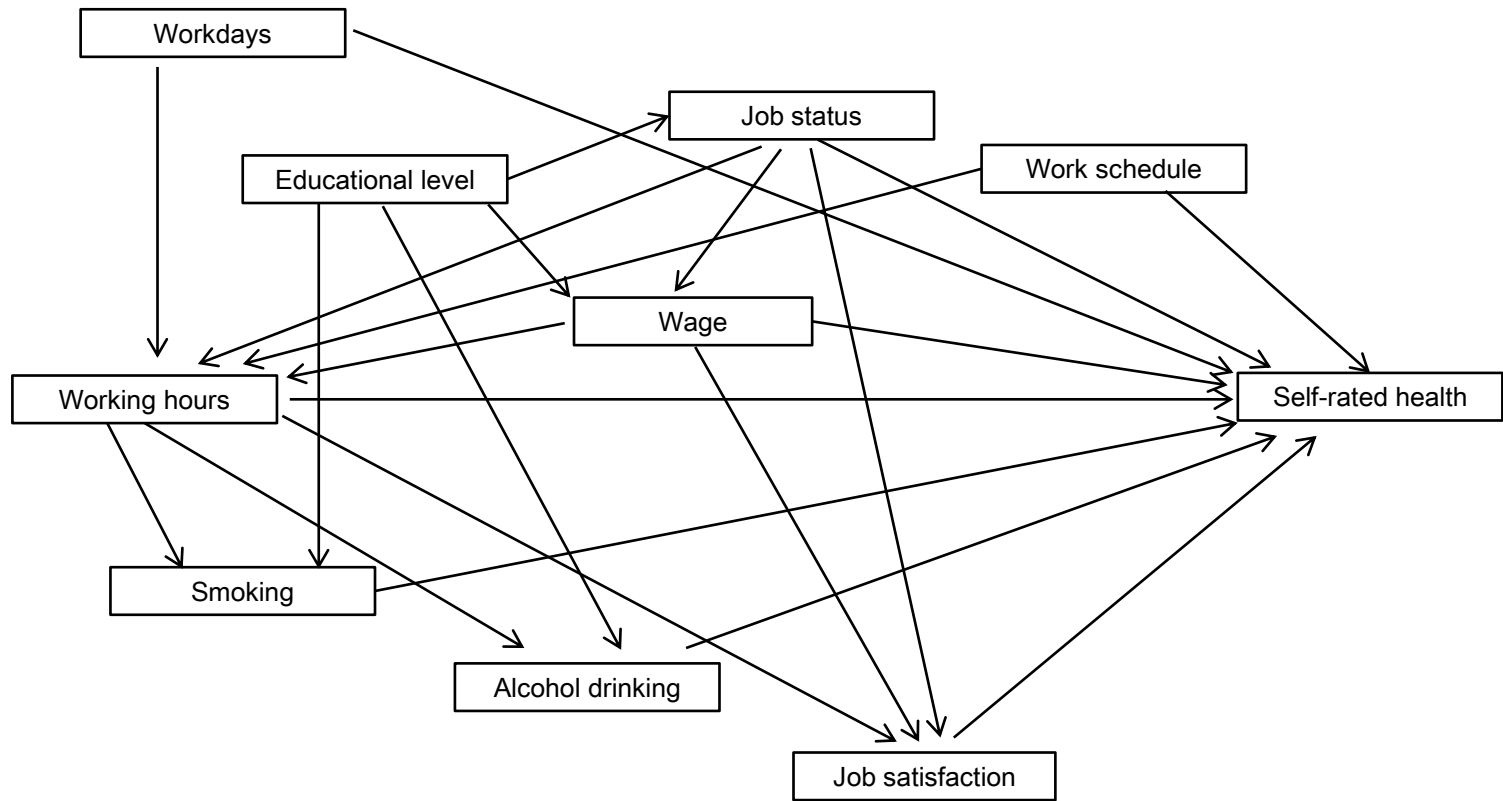

Supplement: MOESM1 [file 9751134]
